# Supplementary material
Source: PubMed Central journal article supplement (PMC6420092)
Supplement: NIHMS81362-supplement-Supplementary_information.pdf [file NIHMS81362-supplement-Supplementary_information.pdf]

# Supplementary Figure 1

a)

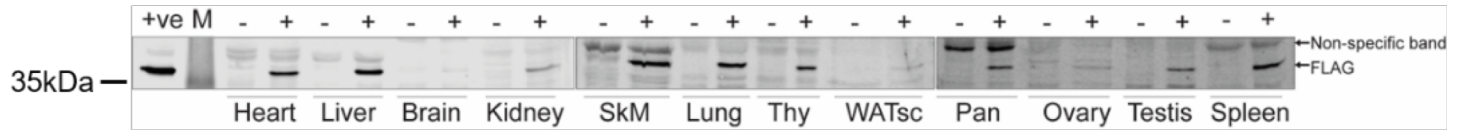

b)

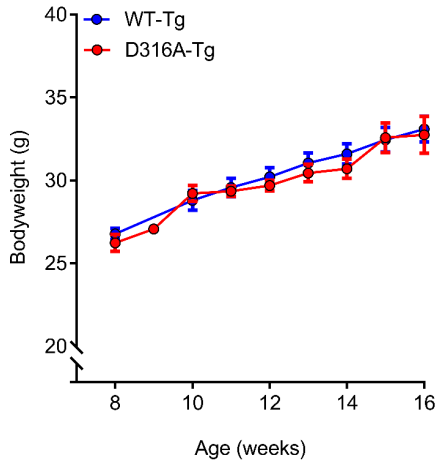

c)

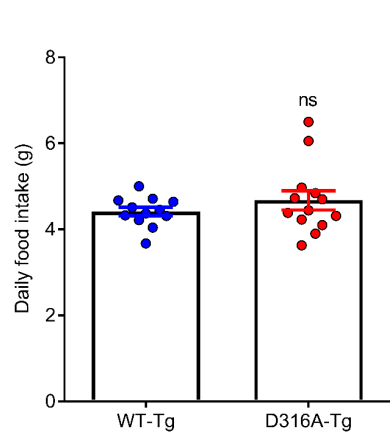

d)

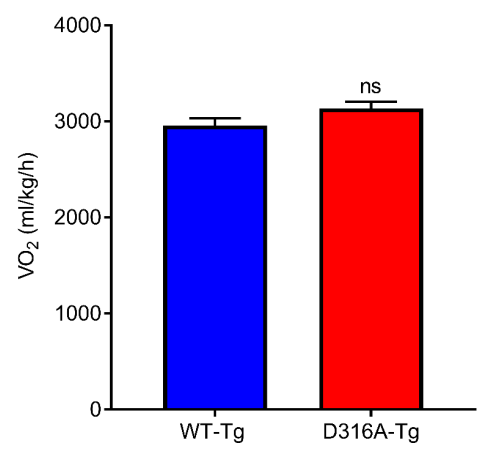

e)

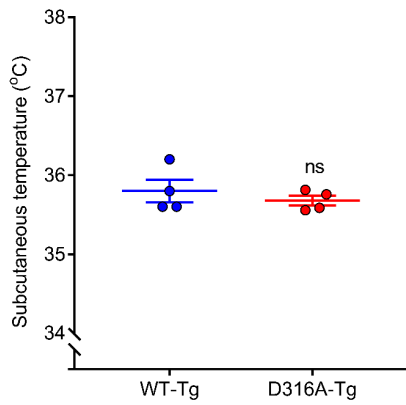

### **Supplementary Figure 1. Phenotype of mice maintained on a chow diet.**

**a**, Representative western blots of AMPK $\gamma$ 1 (containing a C-terminal Flag tag epitope) transgene expression in tissue lysates (SkM, gastrocnemius skeletal muscle; Thy, thymus; WAT<sub>sc</sub>, subcutaneous white adipose tissue; Pan, pancreas) isolated from non-transgenic control mice (-) and D316A-Tg mice crossed with  $\beta$ -actin-cre (+). A sample of HEK293 cells transfected with Flag-tagged AMPK $\gamma$ 1 is included as a positive control. A non-specific cross-reacting band is present in a number of the tissue lysates in both the non-transgenic control mice and D316A-Tg mice. Identical results were obtained on tissue samples from animals isolated from multiple independent experimental cohorts. **b**, Bodyweight of mice maintained on a chow diet (mean  $\pm$ sem, n=20 for WT-Tg and 19 for D316A-Tg) and **(c)** daily food intake on chow measured over a 3-week period (mean  $\pm$ sem, n=12 for WT-Tg and 13 for D316A-Tg). **d**, Oxygen consumption ( $VO_2$ ; mean  $\pm$ sem, n=7 mice per genotype). Data points from individual mice were omitted in the graph to more clearly show mean values and error bar sizes. **(e)** subcutaneous body temperature of mice on a chow diet (n=4 mice per genotype). Statistical analysis for panel b was performed by multiple t-test adjusted for multiple comparisons and for panels c, d and e by Student's t-test. In all cases ns=non-significant.

## Supplementary Figure 2

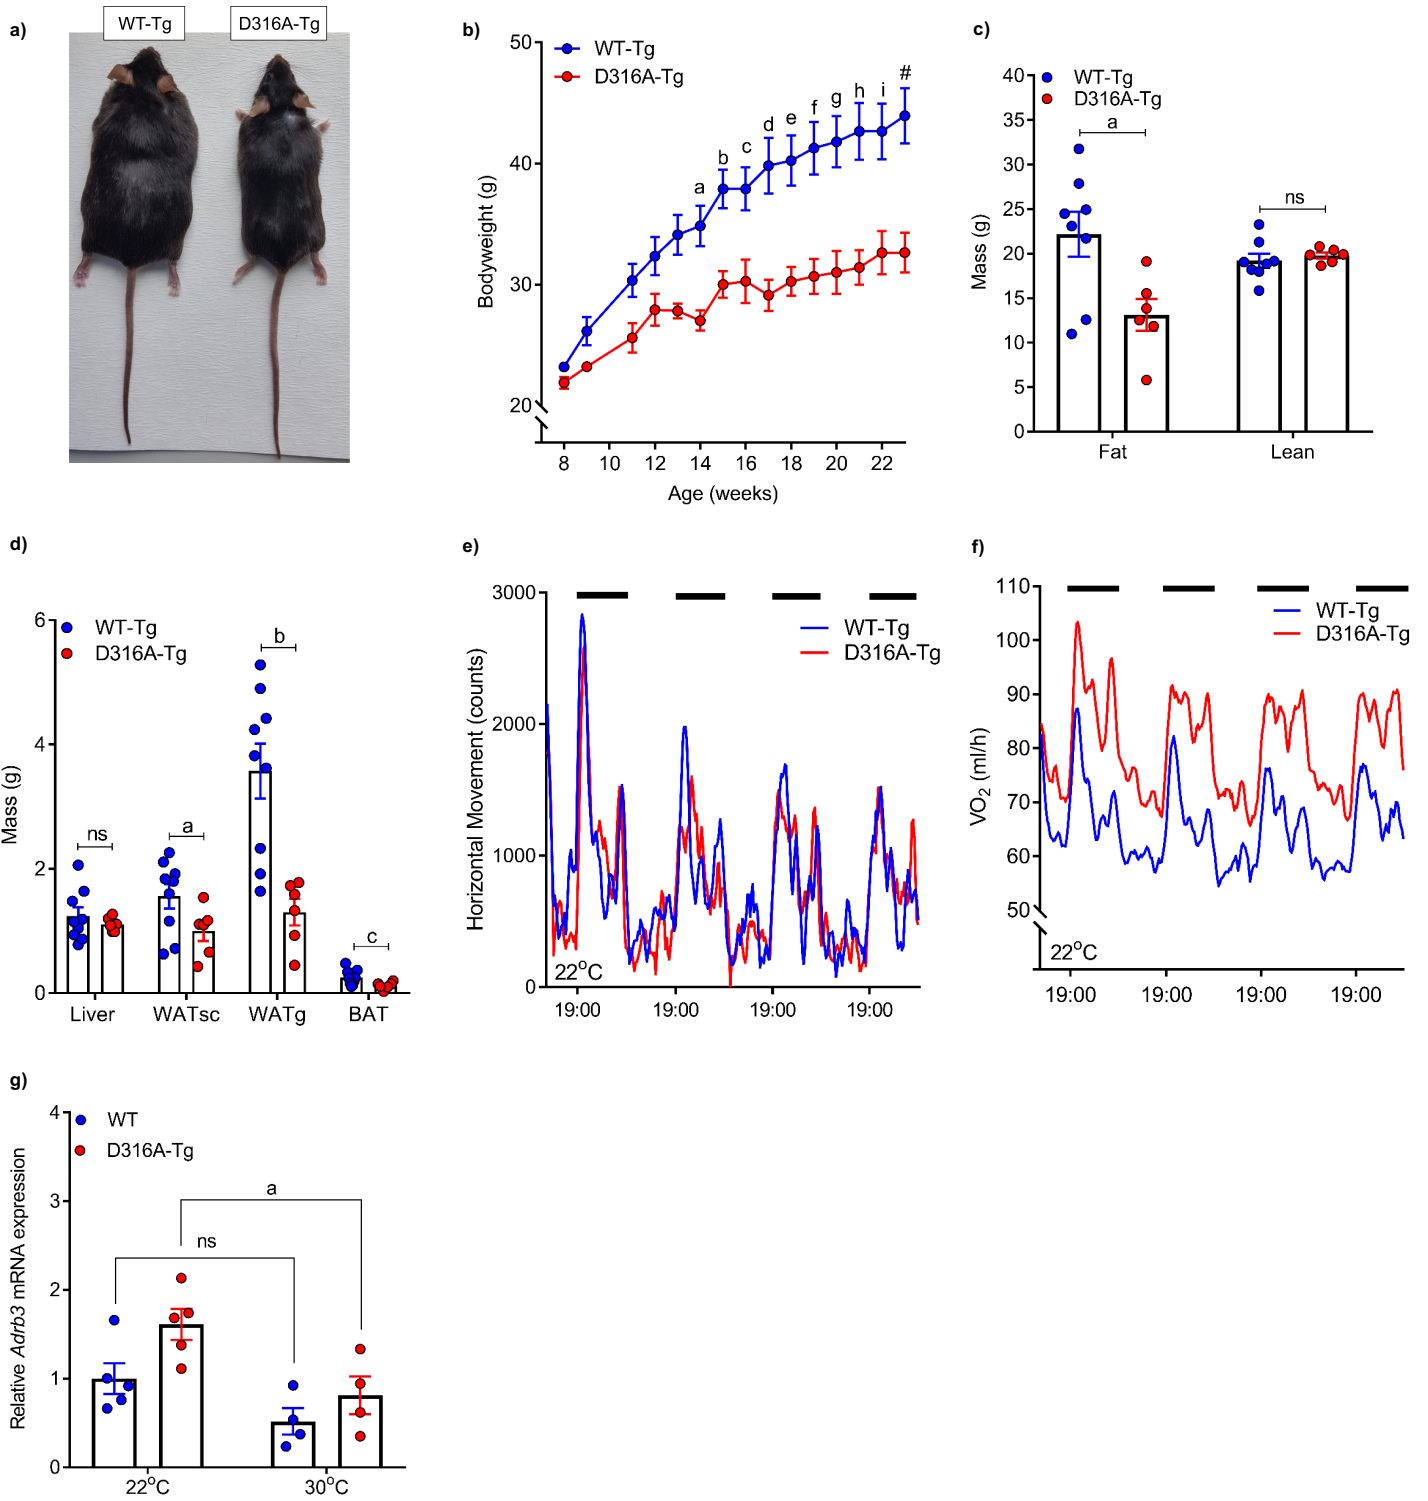

**Supplementary Figure 2. Protection against diet-induced obesity in female mice and oxygen consumption measured per mouse (not corrected for bodyweight).**

**a**, An image showing a representative WT-Tg and D316A-Tg mouse after 16 weeks on HFD diet. Similar results were obtained from >100 mice per genotype from multiple independent experimental cohorts. **b**, Bodyweight of female mice maintained on a HFD from 8 weeks of age. Results shown are the mean  $\pm$ sem (n=9 per genotype). *P* values indicate means that are significantly different from WT-Tg mice; <sup>a</sup>*P*=0.0157, <sup>b</sup>*P*=0.0142, <sup>c</sup>*P*=0.0207, <sup>d</sup>*P*=0.0001, <sup>e</sup>*P*=0.0005, <sup>f</sup>*P*=0.0002, <sup>g</sup>*P*=0.0001, <sup>h</sup>*P*=0.0001, <sup>i</sup>*P*=0.0005, <sup>#</sup>*P*<0.0001. **c**, Total body fat and lean mass measured by EchoMRI body composition analyser (n=8 for WT-Tg and n=6 for D316A-Tg). <sup>a</sup>*P*=0.0022, ns=non-significant. **(d)** tissue weights after 14 weeks on a HFD (n=9 for WT-Tg and n=6 for D316A mice). <sup>a</sup>*P*=0.0199, <sup>b</sup>*P*=0.0007, <sup>c</sup>*P*=0.0345, ns=non-significant. **e**, Movement measured by horizontal beam-breaks over a 84-hour period in male mice fed a HFD for 6 weeks (n=8 for WT-Tg and 6 for D316A-Tg mice). **f**, Whole body oxygen consumption (VO<sub>2</sub>) monitored continuously over an 84-hour period, not corrected for bodyweight (i.e. VO<sub>2</sub> per mouse). n=8 for WT-Tg and 6 for D316A-Tg mice. **g**, mRNA expression of *Adrb3* in BAT from mice housed at 22°C (n=5 per genotype) or 30°C (n=4 per genotype) and fed a HFD for 11 weeks. <sup>a</sup>*P*=0.0383, ns=non-significant. Statistical analysis for panels b and c was performed by two-way ANOVA followed by Bonferroni's multiple comparisons test and for panels d and g by Student's t-test (unpaired, 2-tailed).



# Supplementary Figure 3

a)

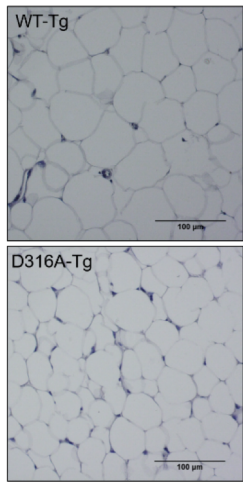

b)

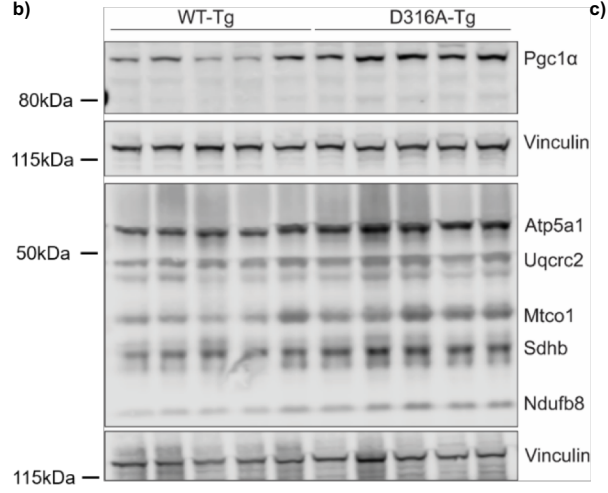

c)

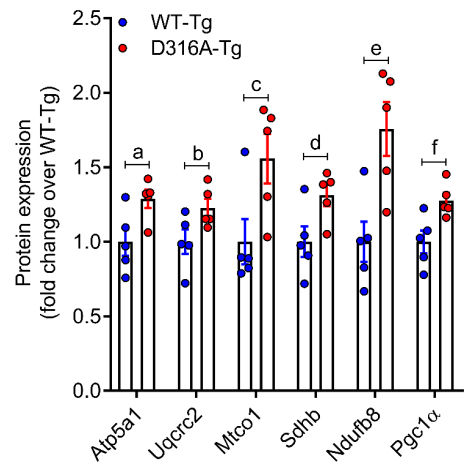

**Supplementary Figure 3. No gross morphological changes in gonadal WAT and Pgc1 $\alpha$  and mitochondrial protein expression on chow diet.**

**a**, Representative images (from 6 mice per genotype from a single cohort) of haematoxylin staining of WATg from WT-Tg and D316A-Tg mice fed a HFD for 16 weeks. Similar results were obtained from mice from multiple (>10) independent experimental cohorts. **b**, Western blot analysis of Pgc1 $\alpha$  and mitochondrial electron transport chain proteins in WATsc from mice maintained on a chow diet. In each case, samples from 5 mice per genotype were analysed and vinculin used as a loading control. **c**, Quantification of protein expression data shown in (**b**). *P* values indicate means that are significantly different from WT-Tg mice; \**P*< 0.05, \*\**P*<0.01. Statistical analysis for panel c was performed by Student's t-test (unpaired, 2-tailed).

## Supplementary Figure 4

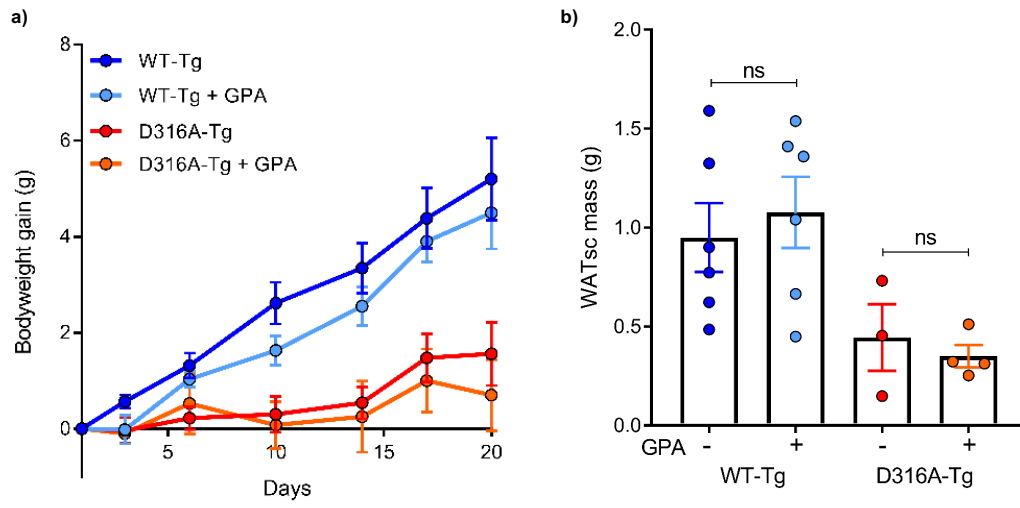

**Supplementary Figure 4. Treatment with  $\beta$ -guanidinopropionic acid does not antagonize the effect of AMPK activation to protect against diet-induced obesity.**

**a**, Eight-week old mice were fed a HFD and after 1 week mice were given access to either distilled water or water containing 0.5% (w/v)  $\beta$ -guanidinopropionic acid ( $\beta$ -GPA). Bodyweights were measured over the next 3 weeks. Results are plotted as the mean  $\pm$ sem (n=6 for WT-Tg mice and n=4-5 for D316A-Tg mice). **b**, Following this 3-week period, WAT<sub>sc</sub> weight was determined (n=6 for WT-Tg mice and n=3-4 for D316A-Tg mice). ns, no significant difference determined by Student's t-test (unpaired, 2-tailed) between  $\beta$ -GPA treated and non-treated animals.

# Supplementary Figure 5

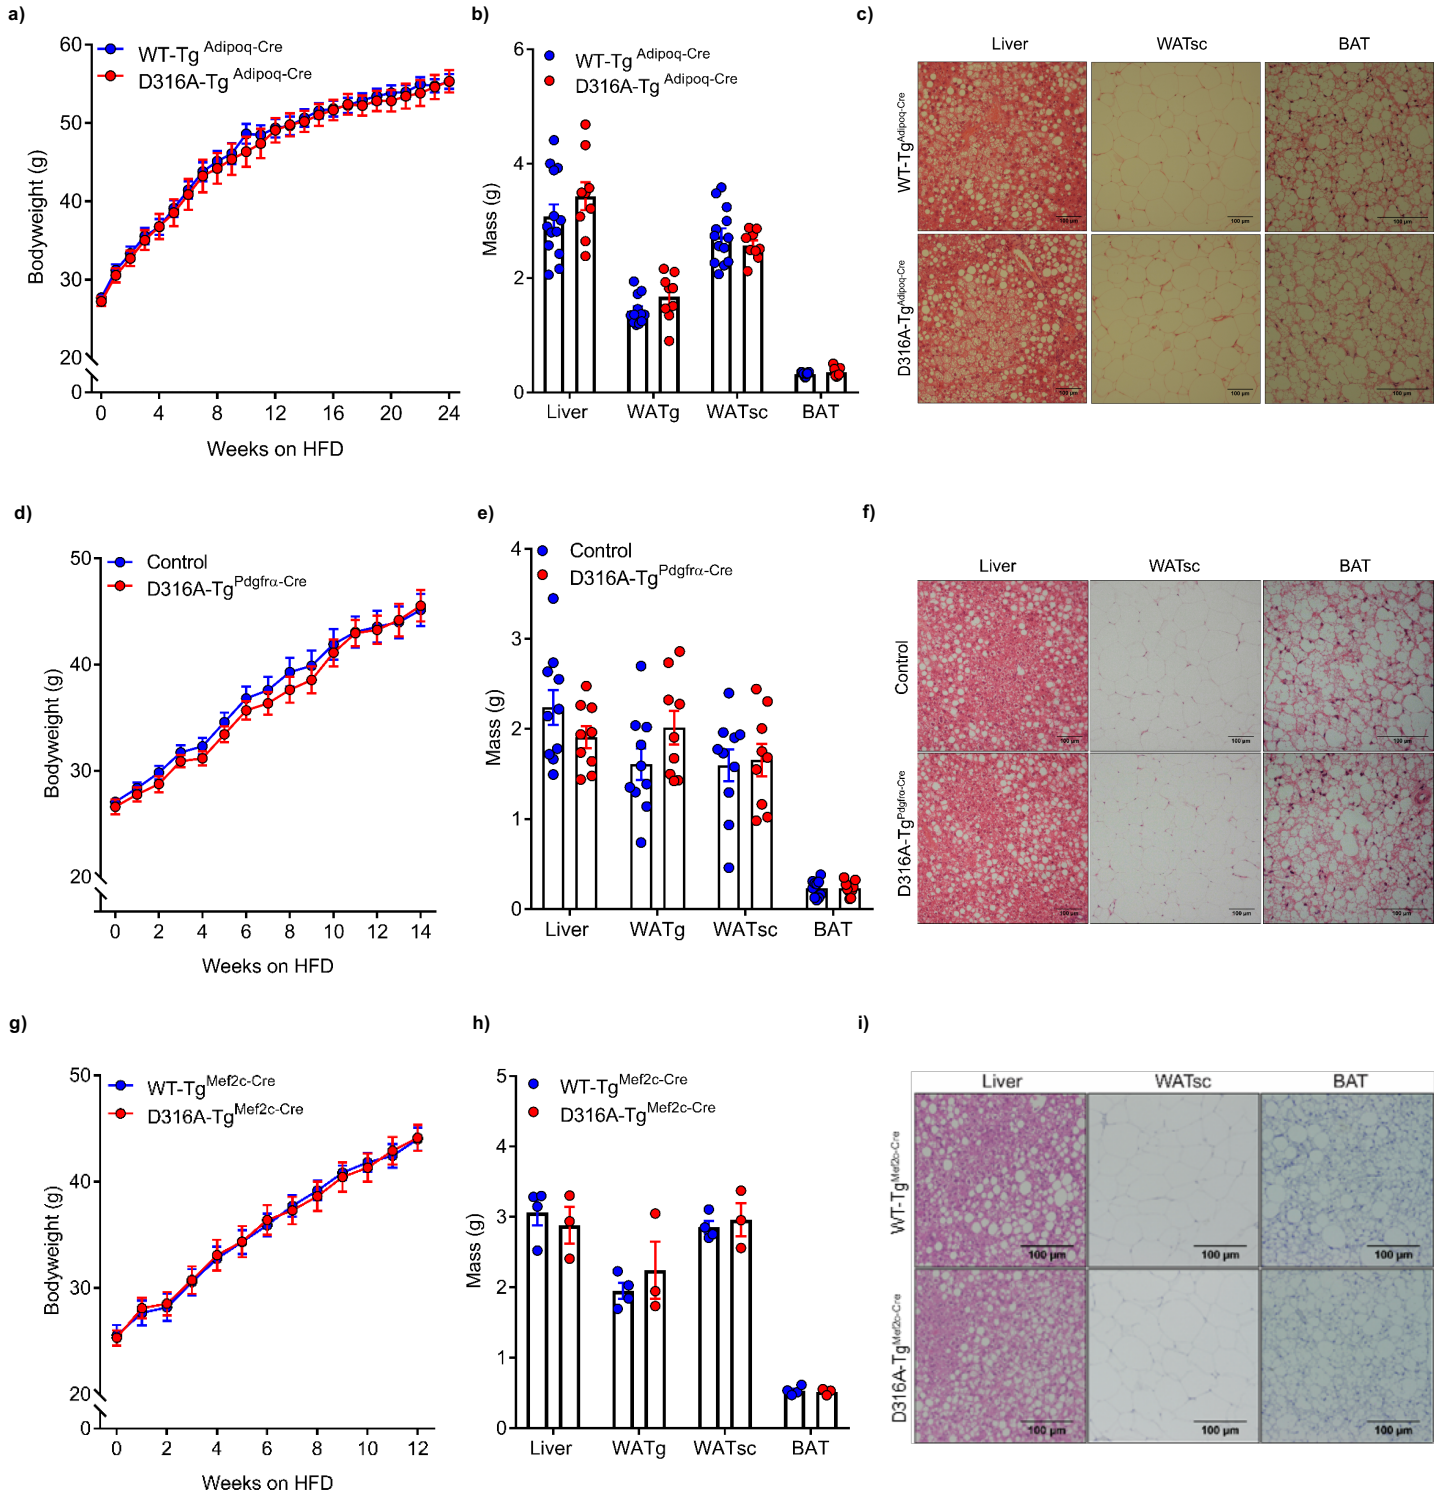

**Supplementary Figure 5. Cell lineage-specific activation of AMPK does not phenocopy global AMPK activation.**

**a-c**, AMPK $\gamma$ 1 floxed mice were crossed with mice expressing Cre-recombinase under the control of (a-c) the adiponectin promoter (Adipoq-Cre, n=13 WT-Tg and n=9 D316A-Tg) to generate mature adipose-specific expression, (**d-f**) the Pdgfra promoter (Pdgfra-Cre, n=10 WT-Tg and n=9 D316A-Tg) or (**g-i**) the Mef2c promoter (Mef2c-Cre, n=8 WT-Tg and n=5 D316A-Tg) to generate skeletal muscle-specific expression. **a**, **d** and **g**, Bodyweight was measured in mice maintained on HFD. **b**, **e** and **h**, Tissue weights at termination (Adipoq-Cre, n=13 WT-Tg and n=9 D316A-Tg; Pdgfra-Cre, n=10 WT-Tg and n=9 D316A-Tg and Mef2c-Cre, n=4 WT-Tg and n=3 D316A-Tg). **c**, **f** and **i**, representative images (from 3-6 mice per group per experiment) of H&E stained tissue sections. Similar results were obtained from an independent cohort of the Adipoq-Cre mice. Results of Pdgfra-Cre and Mef2c-Cre are from a single cohort of mice.

# Supplementary Figure 6

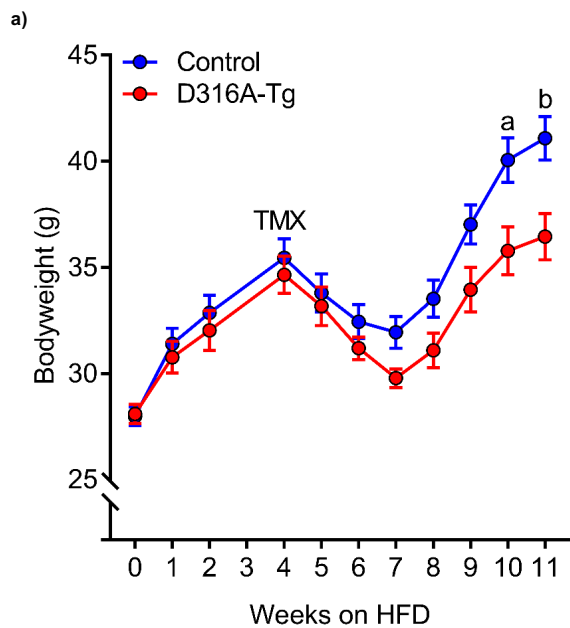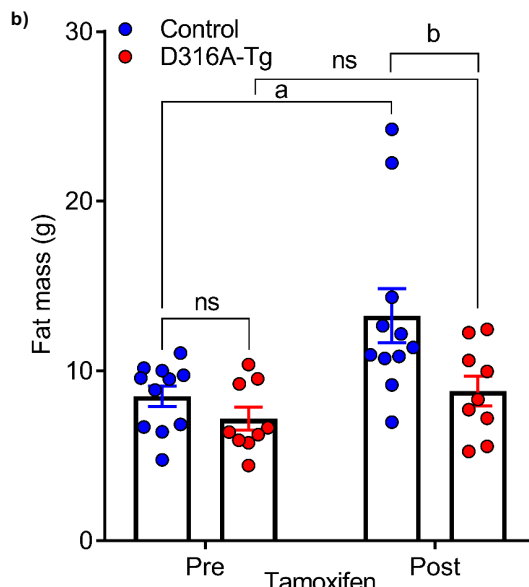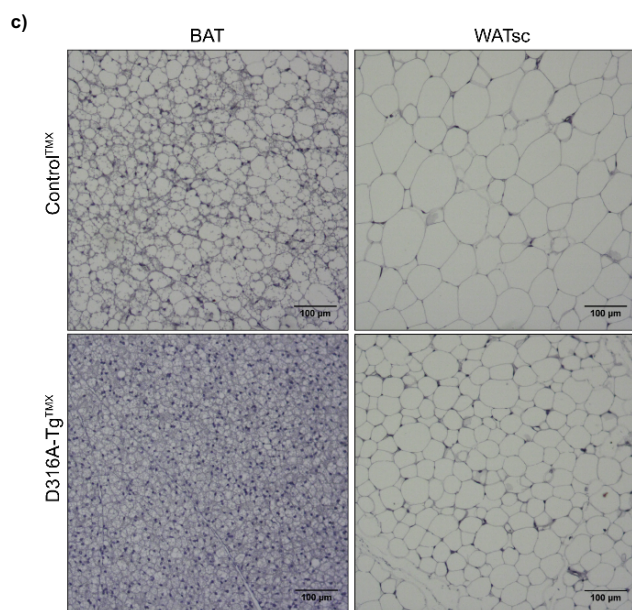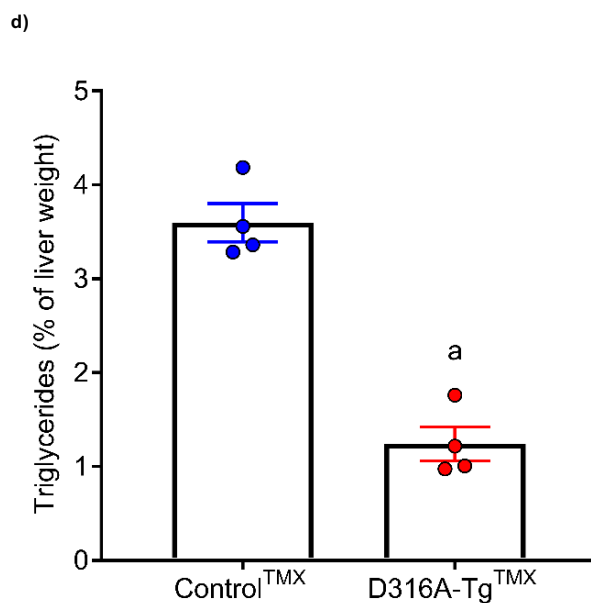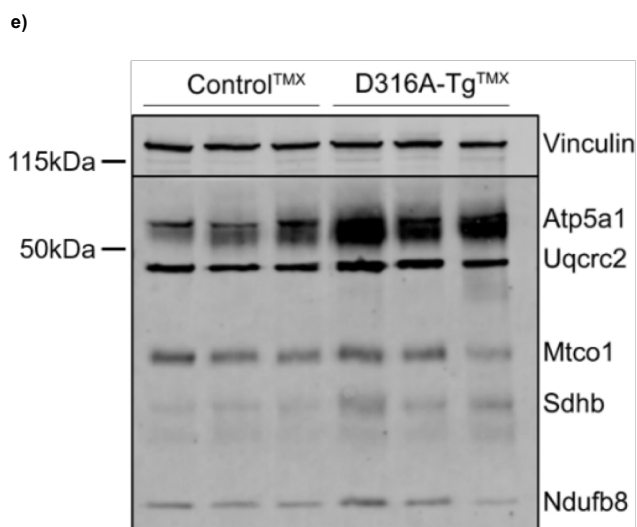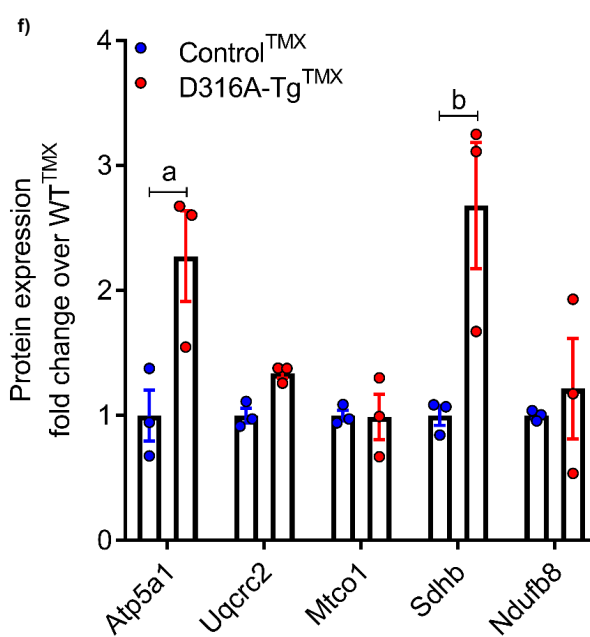

### **Supplementary Figure 6. AMPK activation in adult mice protects against diet-induced obesity**

Male mice expressing both the D316A  $\gamma$ 1 transgene (D316A-Tg, n=9) and an inducible CAGGCre-ER<sup>TM</sup> and either D316A-Tg or CAGGCre-ER<sup>TM</sup> alone (Control, n=10) were fed a high fat diet from 8 weeks of age. After 4 weeks, mice were injected intraperitoneally with tamoxifen (TMX; 3 mg in 0.15 ml corn oil) for 4 consecutive days. Mice were maintained on a high fat diet for a further 7 weeks. **a**, bodyweight of mice maintained on a high fat diet. <sup>a</sup>*P*=0.0055, <sup>b</sup>*P*=0.0018. **b**, Total body fat before, and 6 weeks after, tamoxifen induction. <sup>a</sup>*P*=0.0136, <sup>b</sup>*P*=0.0359. **c**, Representative images (from 6 mice per group, from a single experimental cohort) of haematoxylin staining of BAT and WATsc (scale bar = 100  $\mu$ m). **d**, Liver triglyceride measured as percentage of total liver weight (n=4 per group). <sup>a</sup>*P*=0.0001. **e**, Western blot analysis of mitochondrial electron transport chain proteins in WATsc from tamoxifen treated Control and D316A-Tg mice. Samples from three mice per group are shown and vinculin is used as a loading control. **f**, quantification of protein expression (n=6 mice per group). <sup>a</sup>*P*=0.0095, <sup>b</sup>*P*=0.0007. In all cases, results are the mean  $\pm$ sem. Statistical analysis for panels a, b and f was performed by two-way ANOVA followed by Bonferroni's multiple comparisons test and for panel d by Student's t-test (unpaired, 2-tailed).



# Supplementary Figure 7

a) Figure 2b

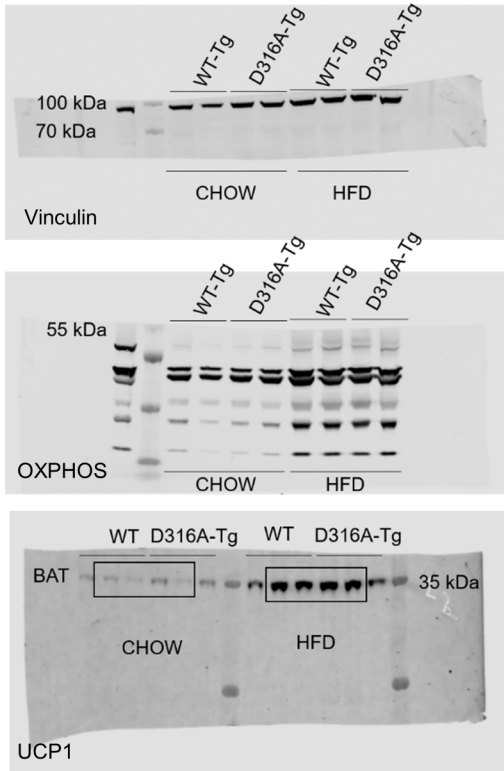

b) Figure 3h

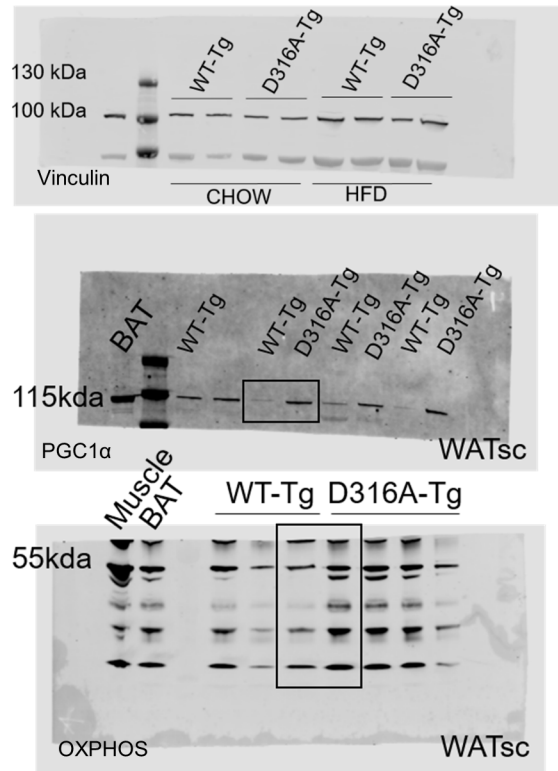

c) Figure 3k

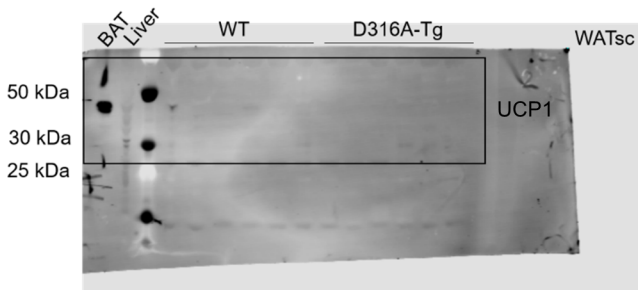

d) Figure 4d

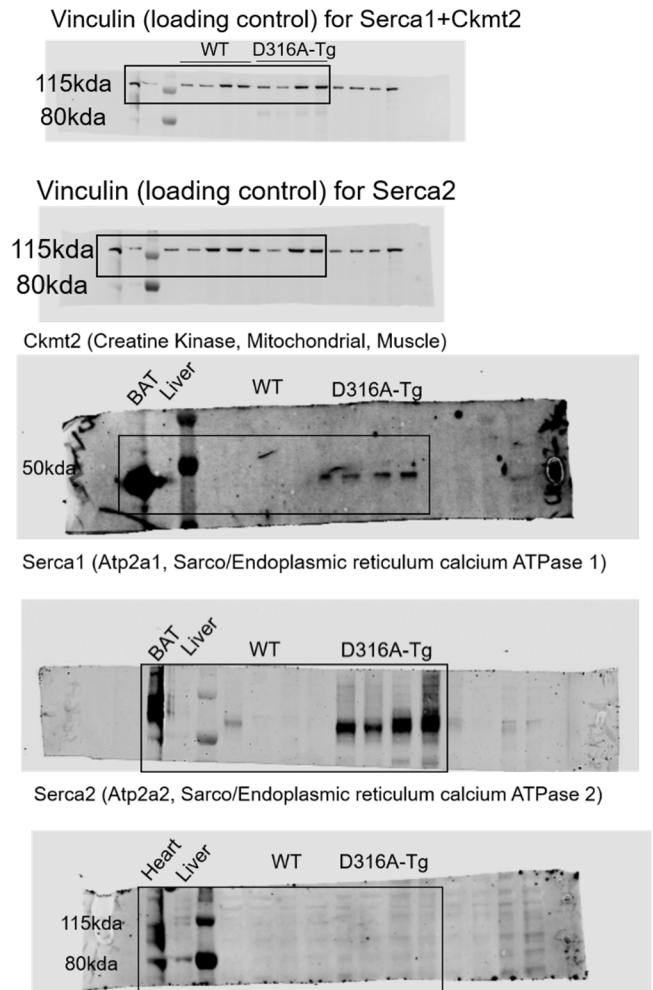

e) Supplementary Figure 1a

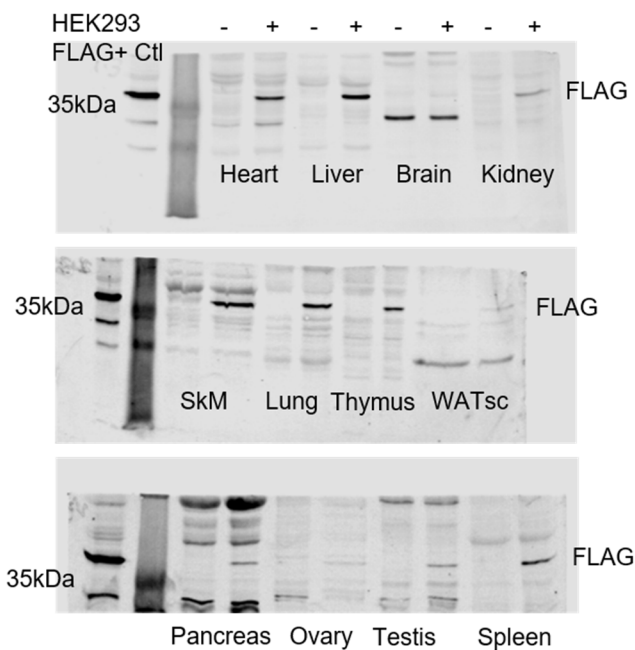

**Supplementary Figure 7. Uncropped Western blots for data shown in Figures.**  
Individual panels show the uncropped blots for the corresponding Figures, as shown.  
Where appropriate, black boxes indicate the lanes used for making the Figures.

**Supplementary Table 1. Effect of global AMPK activation in heart.**

|                              | WT-Tg       | D316A-Tg                  |
|------------------------------|-------------|---------------------------|
| Heart Rate (bpm)             | 772 ±21     | 744 ±26                   |
| PR interval (ms)             | 25.83 ±0.95 | 25.95 ±0.73               |
| QRS complex duration (ms)    | 10.03 ±0.28 | 10.42 ±0.56               |
| Heart weight (% body weight) | 0.603±0.026 | 0.746 ±0.023 <sup>a</sup> |

Heart rate (beats/minute; bpm), PR interval and QRS duration (millisecond, ms) were measured in conscious male mice (12-13 weeks of age maintained on a chow diet) using an ECGenie System. Values are the average ±SEM from 6 mice per genotype. Heart weight as a percentage of total body weight is the average ±SEM for 6 male mice per group (13-16 weeks of age). a  $P=0.0021$  statistically significant difference between wild type and gain-of-function AMPK.
